# Supplementary material for: Clinical impact of pharmacogenomics in pediatric care: insights extracted from clinical exome sequencing
Source: Frontiers journal article supplement (doi:10.3389/fgene.2025.1574325), 2025-05-29
Supplement: Data_Sheet_8.pdf [file Data_Sheet_8.pdf]

## Drug-Gene Associations

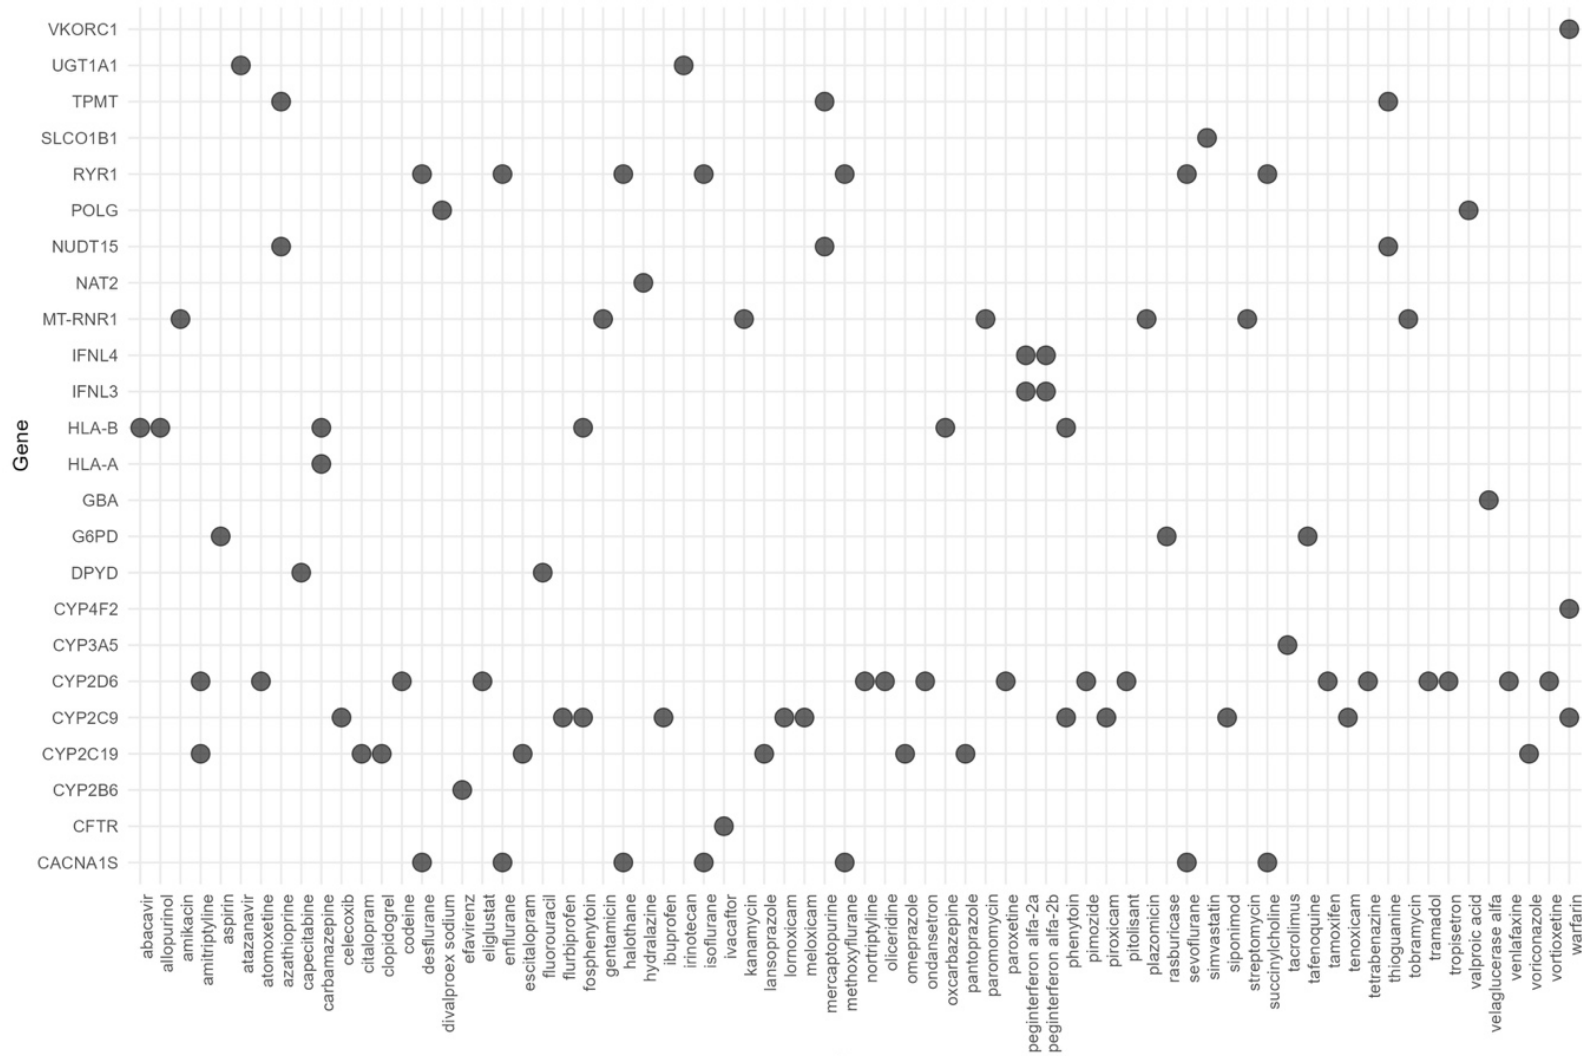

*Data sheet 9. Illustrates drug-gene associations, majority of which are classified as CPIC level A/B and have existing prescribing guidelines.*
