# Supplementary material for: Clinical impact of pharmacogenomics in pediatric care: insights extracted from clinical exome sequencing
Source: Front Genet. 2025 May 29;16:1574325. doi: 10.3389/fgene.2025.1574325 (PMC12159002; doi:10.3389/fgene.2025.1574325)
Supplement: Supplementary file 3 [file Table2.xlsx]

## Sheet: Allele_ABCB1
Allele	Overall_AF	Overall_Count	AFR	AMR	EAS	EUR	SAS
*1	29.9381	1064	58.2418	28.1979	18.5897	33.9667	13.1579
*2	70.0619	2490	41.7582	71.8021	81.4103	66.0333	86.8421

## Sheet: Allele_ABCG2
Allele	Overall_AF	Overall_Count	AFR	AMR	EAS	EUR	SAS
Reference	81.6545	2902	96.1538	78.1513	71.4744	90.2613	92.1053
rs2231142	18.3455	652	3.84615	21.8487	28.5256	9.73872	7.89474

## Sheet: Allele_BCHE
Allele	Overall_AF	Overall_Count	AFR	AMR	EAS	EUR	SAS
.	0.844119	30	1.0989	0.466853	0	2.13777	0
A.rs1799807	0.815982	29	0	0.70028	0	1.66271	0
F1.rs28933389	0.0562746	2	0	0	0	0.23753	0
K.rs1803274	13.731	488	20.8791	11.0644	12.1795	19.2399	17.1053
ref	84.5526	3005	78.022	87.7684	87.8205	76.7221	82.8947

## Sheet: Allele_CACNA1S
Allele	Overall_AF	Overall_Count	AFR	AMR	EAS	EUR	SAS
Reference	100	3554	100	100	100	100	100

## Sheet: Allele_CFTR
Allele	Overall_AF	Overall_Count	AFR	AMR	EAS	EUR	SAS
3849+10kbC->T	0.0562746	2	0	0.0933707	0	0	0
D1152H	0.140687	5	0	0.0933707	0	0.356295	0
D1270N	0.168824	6	2.1978	0.0933707	0	0	0
F1052V	0.0844119	3	0	0.0466853	0	0.23753	0
F508del	0.365785	13	0.549451	0.186741	0	0.950119	0
G1069R	0.0281373	1	0	0	0.320513	0	0
G551D	0.0281373	1	0	0	0	0.118765	0
L206W	0.0562746	2	0	0.0933707	0	0	0
R1070Q	0.0281373	1	0	0	0	0	1.31579
R1070W	0.0281373	1	0	0.0466853	0	0	0
R117H	0.0562746	2	0	0	0	0.23753	0
R74W	0.0844119	3	1.0989	0.0466853	0	0	0
Reference	98.8745	3514	96.1538	99.2997	99.6795	98.0998	98.6842

## Sheet: Allele_CYP17A1
Allele	Overall_AF	Overall_Count	AFR	AMR	EAS	EUR	SAS
R96W	0.0281373	1	0	0.0466853	0	0	0
Reference	99.9719	3553	100	99.9533	100	100	100

## Sheet: Allele_CYP19A1
Allele	Overall_AF	Overall_Count	AFR	AMR	EAS	EUR	SAS
*1	89.758	3190	74.1758	91.5033	82.0513	93.2304	71.0526
*2	0.42206	15	0	0.0466853	4.48718	0	0
*3	3.17952	113	8.79121	2.66106	0.641026	4.51306	0
*4	6.64041	236	17.033	5.78898	12.8205	2.25653	28.9474

## Sheet: Allele_CYP1A1
Allele	Overall_AF	Overall_Count	AFR	AMR	EAS	EUR	SAS
*1	60.9736	2167	78.5714	50.8403	53.2051	84.0855	80.2632
*10	0.0281373	1	0	0.0466853	0	0	0
*12	0.0281373	1	0	0	0.320513	0	0
*13	0.928531	33	0	0.280112	8.65385	0	0
*2A	10.4108	370	19.2308	11.3445	13.4615	4.98812	10.5263
*2B	17.3889	618	1.0989	25.3035	16.3462	2.61283	1.31579
*2C	6.8655	244	0.549451	9.47712	7.05128	1.66271	5.26316
*4	3.03883	108	0.549451	2.61438	0.641026	5.58195	2.63158
*5	0.30951	11	0	0.0933707	0	1.06888	0
*9	0.0281373	1	0	0	0.320513	0	0

## Sheet: Allele_CYP1A2
Allele	Overall_AF	Overall_Count	AFR	AMR	EAS	EUR	SAS
*13	0.0281373	1	0	0	0.320513	0	0
*1A	26.1677	930	36.8132	23.5294	24.0385	29.9287	42.1053
*1C	5.57119	198	4.94505	7.51634	6.41026	0.950119	0
*1F	50.5909	1798	39.011	44.8646	50.641	67.1021	56.5789
*1K	0.0562746	2	0	0	0	0.23753	0
*1L	17.5014	622	19.2308	24.0896	18.5897	1.54394	0
*6	0.0844119	3	0	0	0	0.23753	1.31579

## Sheet: Allele_CYP1B1
Allele	Overall_AF	Overall_Count	AFR	AMR	EAS	EUR	SAS
*1	30.6134	1088	7.14286	34.5472	64.1026	14.0143	22.3684
*2	26.7867	952	13.7363	29.225	20.8333	24.9406	34.2105
*22	0.0281373	1	0	0.0466853	0	0	0
*3	25.7175	914	39.5604	22.1289	10.5769	37.7672	22.3684
*4	12.1272	431	3.2967	10.4108	2.5641	21.2589	19.7368
*5	0.478334	17	3.2967	0.466853	0	0.118765	0
*6	3.68599	131	29.1209	2.66106	1.92308	1.66271	1.31579
*7	0.562746	20	3.84615	0.513539	0	0.23753	0

[truncated: 53 more sheets: Allele_CYP26A1, Allele_CYP2A13, Allele_CYP2A6, Allele_CYP2B6, Allele_CYP2C19, Allele_CYP2C8, Allele_CYP2C9, Allele_CYP2D6, Allele_CYP2E1, Allele_CYP2F1, Allele_CYP2J2, Allele_CYP2R1, Allele_CYP2S1, Allele_CYP2W1, Allele_CYP3A4, Allele_CYP3A43, Allele_CYP3A5, Allele_CYP3A7, Allele_CYP4A11, Allele_CYP4A22 …]
