# Supplementary material for: Clinical impact of pharmacogenomics in pediatric care: insights extracted from clinical exome sequencing
Source: Front Genet. 2025 May 29;16:1574325. doi: 10.3389/fgene.2025.1574325 (PMC12159002; doi:10.3389/fgene.2025.1574325)
Supplement: Supplementary file 6 [file Table3.xlsx]

## Sheet: Phenotype_ABCB1
Type	Phenotype	AFR	AMR	EAS	EUR	SAS
Count	Indeterminate	91	1071	156	421	38
Percentage	Indeterminate	100	100	100	100	100

## Sheet: Phenotype_ABCG2
Type	Phenotype	AFR	AMR	EAS	EUR	SAS
Count	Decreased Function	7	350	67	72	4
Count	Normal Function	84	662	78	344	33
Count	Poor Function	0	59	11	5	1
Percentage	Decreased Function	7.69231	32.6797	42.9487	17.1021	10.5263
Percentage	Normal Function	92.3077	61.8114	50	81.7102	86.8421
Percentage	Poor Function	0	5.50887	7.05128	1.18765	2.63158

## Sheet: Phenotype_BCHE
Type	Phenotype	AFR	AMR	EUR	EAS	SAS
Count	Indeterminate Activity	1	5	9	0	0
Count	Mild Deficiency	30	195	131	28	5
Count	Moderate Deficiency	4	30	27	5	4
Count	Normal Activity	56	841	254	123	29
Percentage	Indeterminate Activity	1.0989	0.466853	2.13777	0	0
Percentage	Mild Deficiency	32.967	18.2073	31.1164	17.9487	13.1579
Percentage	Moderate Deficiency	4.3956	2.80112	6.4133	3.20513	10.5263
Percentage	Normal Activity	61.5385	78.5247	60.3325	78.8462	76.3158

## Sheet: Phenotype_CACNA1S
Type	Phenotype	AFR	AMR	EAS	EUR	SAS
Count	Uncertain Susceptibility	91	1071	156	421	38
Percentage	Uncertain Susceptibility	100	100	100	100	100

## Sheet: Phenotype_CFTR
Type	Phenotype	AFR	AMR	EAS	EUR	SAS
Count	Favorable Response	4	9	1	8	1
Count	Indeterminate	87	1062	155	413	37
Percentage	Favorable Response	4.3956	0.840336	0.641026	1.90024	2.63158
Percentage	Indeterminate	95.6044	99.1597	99.359	98.0998	97.3684

## Sheet: Phenotype_CYP17A1
Type	Phenotype	AFR	AMR	EAS	EUR	SAS
Count	Indeterminate	91	1071	156	421	38
Percentage	Indeterminate	100	100	100	100	100

## Sheet: Phenotype_CYP19A1
Type	Phenotype	AFR	AMR	EAS	EUR	SAS
Count	Indeterminate	91	1071	156	421	38
Percentage	Indeterminate	100	100	100	100	100

## Sheet: Phenotype_CYP1A1
Type	Phenotype	AFR	AMR	EAS	EUR	SAS
Count	Indeterminate	91	1071	156	421	38
Percentage	Indeterminate	100	100	100	100	100

## Sheet: Phenotype_CYP1A2
Type	Phenotype	AFR	AMR	EAS	EUR	SAS
Count	Indeterminate	91	1071	156	421	38
Percentage	Indeterminate	100	100	100	100	100

## Sheet: Phenotype_CYP1B1
Type	Phenotype	AFR	AMR	EAS	EUR	SAS
Count	Indeterminate	91	1071	156	421	38
Percentage	Indeterminate	100	100	100	100	100

[truncated: 55 more sheets: Phenotype_CYP26A1, Phenotype_CYP2A13, Phenotype_CYP2A6, Phenotype_CYP2B6, Phenotype_CYP2C19, Phenotype_CYP2C8, Phenotype_CYP2C9, Phenotype_CYP2D6, Phenotype_CYP2E1, Phenotype_CYP2F1, Phenotype_CYP2J2, Phenotype_CYP2R1, Phenotype_CYP2S1, Phenotype_CYP2W1, Phenotype_CYP3A4, Phenotype_CYP3A43, Phenotype_CYP3A5, Phenotype_CYP3A7, Phenotype_CYP4A11, Phenotype_CYP4A22 …]
