# Supplementary material for: Clinical impact of pharmacogenomics in pediatric care: insights extracted from clinical exome sequencing
Source: Front Genet. 2025 May 29;16:1574325. doi: 10.3389/fgene.2025.1574325 (PMC12159002; doi:10.3389/fgene.2025.1574325)
Supplement: Supplementary file 10 [file Table1.xlsx]

## Sheet: Sheet1
Column1	Column2	Column3	Column4	Column5	Column6	Column7	Column8	Column9	Column10	Column11
			Clinical Exome Sequencing				Clinical Whole Genome Sequencing
			DRAGEN		PyPGx		DRAGEN		PyPGx
Coriell Sample ID	Gene	GETRM Consensus Call	Genotype	Phenotype	Genotype	Phenotype	Genotype	Phenotype	Genotype	Phenotype
NA01251	CYP2B6		*1/*1	Normal Metabolizer	*1/*1	Normal Metabolizer	*1/*1	Normal Metabolizer	*1/*1	Normal Metabolizer
NA02016	CYP2B6		*1/*22	Rapid Metabolizer	*1/*22	Rapid Metabolizer	*1/*22	Rapid Metabolizer	*1/*22	Rapid Metabolizer
NA17280	CYP2B6		*1/*9	Intermediate Metabolizer	*1/*6	Intermediate Metabolizer	*1/*6;*4/*9		*1/*6	Intermediate Metabolizer
NA12813	CYP2B6	*1/*2	*1/*2	Normal Metabolizer	*1/*2	Normal Metabolizer	*1/*2	Normal Metabolizer	*1/*2	Normal Metabolizer
NA18552	CYP2B6	*1/*6	*1/*6;*4/*9		*1/*9	Intermediate Metabolizer	*1/*6;*4/*9		*1/*6	Intermediate Metabolizer
NA18617	CYP2B6	*1/*4	*1/*1	Normal Metabolizer	*1/*1	Normal Metabolizer	*1/*4	Rapid Metabolizer	*1/*4	Rapid Metabolizer
NA18855	CYP2B6	*6/*6	*6/*6	Poor Metabolizer	*6/*6	Poor Metabolizer	*6/*6	Poor Metabolizer	*6/*6	Poor Metabolizer
NA18861	CYP2B6	*1/*18	*1/*18	Intermediate Metabolizer	*1/*18	Intermediate Metabolizer	*1/*18	Intermediate Metabolizer	*1/*18	Intermediate Metabolizer
NA19226	CYP2B6	*18/*(20)	*18/*20	Poor Metabolizer	*9/*18	Poor Metabolizer	*18/*20	Poor Metabolizer	*6/*18	Poor Metabolizer
NA19908	CYP2B6	*1/*6	*1/*6;*4/*9		*1/*9	Intermediate Metabolizer	*1/*6;*4/*9		*1/*6	Intermediate Metabolizer
NA01251	CYP2C19		*1/*1	Normal Metabolizer	*1/*1	Normal Metabolizer	*1/*1	Normal Metabolizer	*1/*1	Normal Metabolizer
NA02016	CYP2C19		*1/*2	Intermediate Metabolizer	*1/*2	Intermediate Metabolizer	*1/*2	Intermediate Metabolizer	*1/*2	Intermediate Metabolizer
NA17280	CYP2C19		*1/*8	Intermediate Metabolizer	*1/*8	Intermediate Metabolizer	*1/*8	Intermediate Metabolizer	*1/*8	Intermediate Metabolizer
NA12813	CYP2C19	*1/*17	*1/*38	Normal Metabolizer	*1/*38	Normal Metabolizer	*17/*38	Rapid Metabolizer	*17/*38	Rapid Metabolizer
NA18552	CYP2C19	*1/*4	*1/*4	Intermediate Metabolizer	*1/*4	Intermediate Metabolizer	*1/*4	Intermediate Metabolizer	*1/*4	Intermediate Metabolizer
NA18617	CYP2C19	*1/*2	*1/*2	Intermediate Metabolizer	*1/*2	Intermediate Metabolizer	*1/*2	Intermediate Metabolizer	*1/*2	Intermediate Metabolizer
NA18855	CYP2C19	*1/*2	*1/*2	Intermediate Metabolizer	*1/*2	Intermediate Metabolizer	*1/*2	Intermediate Metabolizer	*1/*2	Intermediate Metabolizer
NA18861	CYP2C19	*1/*1	*1/*1	Normal Metabolizer	*1/*1	Normal Metabolizer	*1/*1	Normal Metabolizer	*1/*1	Normal Metabolizer
NA19226	CYP2C19	*1/*2	*1/*2	Intermediate Metabolizer	*1/*2	Intermediate Metabolizer	*1/*2	Intermediate Metabolizer	*1/*2	Intermediate Metabolizer
NA19908	CYP2C19	*1/*17	*17/*17	Ultrarapid Metabolizer	*17/*17	Ultrarapid Metabolizer	*1/*17	Rapid Metabolizer	*1/*17	Rapid Metabolizer
NA01251	CYP2C9		*1/*1	Normal Metabolizer	*1/*1	Normal Metabolizer	*1/*17	Rapid Metabolizer	*1/*17	Rapid Metabolizer
NA02016	CYP2C9		*1/*1	Normal Metabolizer	*1/*1	Normal Metabolizer	*1/*1	Normal Metabolizer	*1/*1	Normal Metabolizer
NA17280	CYP2C9		*2/*1	Intermediate Metabolizer	*1/*2	Intermediate Metabolizer	*3/*1	Intermediate Metabolizer	*1/*3	Intermediate Metabolizer
NA12813	CYP2C9	*1/*3	*3/*1	Intermediate Metabolizer	*1/*3	Intermediate Metabolizer	*3/*1	Intermediate Metabolizer	*1/*3	Intermediate Metabolizer
NA18552	CYP2C9	*1/*1	*1/*1	Normal Metabolizer	*1/*1	Normal Metabolizer	*1/*1	Normal Metabolizer	*1/*1	Normal Metabolizer
NA18617	CYP2C9	*1/*1	*1/*1	Normal Metabolizer	*1/*1	Normal Metabolizer	*1/*1	Normal Metabolizer	*1/*1	Normal Metabolizer
NA18855	CYP2C9	*1/*9	*9/*1	Normal Metabolizer	*1/*9	Normal Metabolizer	*9/*1	Normal Metabolizer	*1/*9	Normal Metabolizer
NA18861	CYP2C9	*1/*1	*1/*1	Normal Metabolizer	*1/*1	Normal Metabolizer	*1/*1	Normal Metabolizer	*1/*1	Normal Metabolizer
NA19226	CYP2C9	*1/*8	*8/*1	Intermediate Metabolizer	*1/*8	Intermediate Metabolizer	*8/*1	Intermediate Metabolizer	*1/*8	Intermediate Metabolizer
NA19908	CYP2C9	*1/*5	*5/*1	Intermediate Metabolizer	*1/*5	Intermediate Metabolizer	*5/*1	Intermediate Metabolizer	*1/*5	Intermediate Metabolizer
NA01251	CYP2D6		*2/*5	Intermediate Metabolizer	*2/*5	Intermediate Metabolizer	*2/*5	Intermediate Metabolizer	*2/*5	Intermediate Metabolizer
NA02016	CYP2D6		*17/*2x3		Indeterminate	Indeterminate	*17/*2x2	Ultrarapid Metabolizer	*2x2/*17	Ultrarapid Metabolizer
NA17280	CYP2D6		None		*3/*3	Poor Metabolizer	*3/*59	Intermediate Metabolizer	*3/*59	Intermediate Metabolizer
NA12813	CYP2D6	*2/*4	*13/*13+*34+*4.013		*4/*4	Poor Metabolizer	*2/*4	Intermediate Metabolizer	*2/*4	Intermediate Metabolizer
NA18552	CYP2D6	*1/*14	*1/*13+*14		*1/*14	Normal Metabolizer	*1/*14	Normal Metabolizer	*1/*14	Normal Metabolizer
NA18617	CYP2D6	*36+*10/*36+*10	*10+*36/*10+*36x2		*36+*10/*36x2+*10	Intermediate Metabolizer	*10+*36/*10+*36		*36+*10/*36+*10	Intermediate Metabolizer
NA18855	CYP2D6	*1/*5	*1/*5	Intermediate Metabolizer	*1/*5	Intermediate Metabolizer	*1/*5	Intermediate Metabolizer	*1/*5	Intermediate Metabolizer
NA18861	CYP2D6	*5/*29	*29/*5	Intermediate Metabolizer	*5/*29	Intermediate Metabolizer	*29/*5	Intermediate Metabolizer	*5/*29	Intermediate Metabolizer
NA19226	CYP2D6	*2/*2+2	*13+*2/*2x2		Indeterminate	Indeterminate	*2/*2x2	Ultrarapid Metabolizer	*2/*2x2	Ultrarapid Metabolizer
NA19908	CYP2D6	*1/*46	*1/*13+*46		*1/*46	Normal Metabolizer	*1/*46	Normal Metabolizer	*1/*46	Normal Metabolizer
NA01251	CYP3A5		*3/*3	Poor Metabolizer	*3/*3	Poor Metabolizer	*3/*3	Poor Metabolizer	*3/*3	Poor Metabolizer
NA02016	CYP3A5		*3/*1	Intermediate Metabolizer	*1/*3	Intermediate Metabolizer	*3/*1	Intermediate Metabolizer	*1/*3	Intermediate Metabolizer
NA17280	CYP3A5		*3/*3	Poor Metabolizer	*3/*3	Poor Metabolizer	*3/*3	Poor Metabolizer	*3/*3	Poor Metabolizer
NA12813	CYP3A5	*3/*3	*3/*3	Poor Metabolizer	*3/*3	Poor Metabolizer	*3/*3	Poor Metabolizer	*3/*3	Poor Metabolizer
NA18552	CYP3A5	*3/*3	*3/*3	Poor Metabolizer	*3/*3	Poor Metabolizer	*3/*3	Poor Metabolizer	*3/*3	Poor Metabolizer
NA18617	CYP3A5	*3/*3	*3/*3	Poor Metabolizer	*3/*3	Poor Metabolizer	*3/*3	Poor Metabolizer	*3/*3	Poor Metabolizer
NA18855	CYP3A5	*3/*6	*3/*6	Poor Metabolizer	*3/*6	Poor Metabolizer	*3/*6	Poor Metabolizer	*3/*6	Poor Metabolizer
NA18861	CYP3A5	*1/*1	*1/*1	Normal Metabolizer	*1/*1	Normal Metabolizer	*1/*1	Normal Metabolizer	*1/*1	Normal Metabolizer
NA19226	CYP3A5	*1/*6	*6/*1	Intermediate Metabolizer	*1/*6	Intermediate Metabolizer	*6/*1	Intermediate Metabolizer	*1/*6	Intermediate Metabolizer
NA19908	CYP3A5	*1/*3	*3/*1	Intermediate Metabolizer	*1/*3	Intermediate Metabolizer	*3/*1	Intermediate Metabolizer	*1/*3	Intermediate Metabolizer
NA01251	CYP4F2		*1/*1		*1/*1	Indeterminate	*1/*1		*1/*1	Indeterminate
NA02016	CYP4F2		*1/*1		*1/*1	Indeterminate	*1/*1		*1/*1	Indeterminate
NA17280	CYP4F2		*1/*1		*1/*1	Indeterminate	*1/*1		*1/*1	Indeterminate
NA12813	CYP4F2	*1/*3	*3/*1		*1/*3	Indeterminate	*3/*1		*1/*3	Indeterminate
NA18552	CYP4F2	*1/*3	*3/*1		*1/*3	Indeterminate	*3/*1		*1/*3	Indeterminate
NA18617	CYP4F2	*1/*1	*1/*1		*1/*1	Indeterminate	*1/*1		*1/*1	Indeterminate
NA18855	CYP4F2	*1/*1	*1/*1		*1/*1	Indeterminate	*1/*1		*1/*1	Indeterminate
NA18861	CYP4F2	*1/*1	*1/*1		*1/*1	Indeterminate	*1/*1		*1/*1	Indeterminate
NA19226	CYP4F2	*1/*2	*2/*1		*1/*2	Indeterminate	*2/*1		*1/*2	Indeterminate
NA19908	CYP4F2	*2/*3	*2/*3		*2/*3	Indeterminate	*2/*3		*2/*3	Indeterminate
NA01251	DPYD		c.85T>C(*9A)/c.1218G>A	Normal Metabolizer	c.85T>C (*9A)/c.1218G>A	Normal Metabolizer	c.85T>C(*9A)/c.1218G>A	Normal Metabolizer	c.85T>C (*9A)/c.1218G>A	Normal Metabolizer
NA02016	DPYD		c.2194G>A(*6)/c.2194G>A(*6)	Normal Metabolizer	c.2194G>A (*6)/c.2194G>A (*6)	Normal Metabolizer	c.2194G>A(*6)/c.2194G>A(*6)	Normal Metabolizer	c.2194G>A (*6)/c.2194G>A (*6)	Normal Metabolizer
NA17280	DPYD		c.1627A>G(*5)/Reference	Normal Metabolizer	Reference/c.1627A>G (*5)	Normal Metabolizer	c.1627A>G(*5)/Reference	Normal Metabolizer	Reference/c.1627A>G (*5)	Normal Metabolizer
NA12813	DPYD	*1/*4	c.1601G>A(*4)/Reference	Normal Metabolizer	Reference/c.1601G>A (*4)	Normal Metabolizer	c.1601G>A(*4)/Reference	Normal Metabolizer	Reference/c.1601G>A (*4)	Normal Metabolizer
NA18552	DPYD	*1/*5	c.1627A>G(*5)/Reference	Normal Metabolizer	Reference/c.1627A>G (*5)	Normal Metabolizer	c.1627A>G(*5)/Reference	Normal Metabolizer	Reference/c.1627A>G (*5)	Normal Metabolizer
NA18617	DPYD	*1/*1	Reference/Reference	Normal Metabolizer	Reference/Reference	Normal Metabolizer	Reference/Reference	Normal Metabolizer	Reference/Reference	Normal Metabolizer
NA18855	DPYD	*9/*9	./.		c.85T>C (*9A)/c.85T>C (*9A)	Normal Metabolizer	./.		c.85T>C (*9A)/c.85T>C (*9A)	Normal Metabolizer
NA18861	DPYD	*1/*9	c.85T>C(*9A)/Reference	Normal Metabolizer	Reference/c.85T>C (*9A)	Normal Metabolizer	c.85T>C(*9A)/Reference	Normal Metabolizer	Reference/c.85T>C (*9A)	Normal Metabolizer
NA19226	DPYD	*1/*9	c.85T>C(*9A)/c.1218G>A	Normal Metabolizer	c.85T>C (*9A)/c.1218G>A	Normal Metabolizer	c.85T>C(*9A)/c.1218G>A	Normal Metabolizer	Reference/c.85T>C (*9A)	Normal Metabolizer
NA19908	DPYD	*1/*9	./.		Reference/c.85T>C (*9A)	Normal Metabolizer	./.		c.85T>C (*9A)/c.1896T>C	Normal Metabolizer
NA01251	SLCO1B1		*20/*31	Decreased Function	*20/*31	Decreased Function	*20/*31	Decreased Function	*20/*31	Decreased Function
NA02016	SLCO1B1		*15/*46	Poor Function	*15/*46	Poor Function	*15/*46	Poor Function	*15/*46	Poor Function
NA17280	SLCO1B1		*14/*20	Increased Function	*14/*20	Increased Function	*14/*20	Increased Function	*14/*20	Increased Function
NA12813	SLCO1B1	*1/*20	*19/*37:*20/*1		*19/*37	Indeterminate	*19/*37:*20/*1		*1/*20	Normal Function
NA18552	SLCO1B1	*37/*15	*15/*37	Decreased Function	*15/*37	Decreased Function	*15/*37	Decreased Function	*15/*37	Decreased Function
NA18617	SLCO1B1	*37/*37	*37/*37	Normal Function	*37/*37	Normal Function	*37/*37	Normal Function	*37/*37	Normal Function
NA18855	SLCO1B1	*37/*37	*37/*37	Normal Function	*37/*37	Normal Function	*37/*37	Normal Function	*37/*37	Normal Function
NA18861	SLCO1B1	*1/*43	*4/*44:*43/*1		*1/*43	Indeterminate	*4/*44:*43/*1		*1/*43	Indeterminate
NA19226	SLCO1B1	*31/*37	*31/*37	Decreased Function	*31/*37	Decreased Function	*31/*37	Decreased Function	*31/*37	Decreased Function
NA19908	SLCO1B1	*37/*37	*37/*37	Normal Function	*37/*37	Normal Function	*37/*37	Normal Function	*37/*37	Normal Function
NA01251	TPMT		*1/*1	Normal Metabolizer	*1/*1	Normal Metabolizer	*1/*1	Normal Metabolizer	*1/*1	Normal Metabolizer
NA02016	TPMT		*1/*1	Normal Metabolizer	*1/*1	Normal Metabolizer	*1/*1	Normal Metabolizer	*1/*1	Normal Metabolizer
NA17280	TPMT		*1/*1	Normal Metabolizer	*1/*1	Normal Metabolizer	*1/*1	Normal Metabolizer	*1/*1	Normal Metabolizer
NA12813	TPMT	*1/*1	*1/*1	Normal Metabolizer	*1/*1	Normal Metabolizer	*1/*1	Normal Metabolizer	*1/*1	Normal Metabolizer
NA18552	TPMT	*1/*1	*1/*1	Normal Metabolizer	*1/*1	Normal Metabolizer	*1/*1	Normal Metabolizer	*1/*1	Normal Metabolizer
NA18617	TPMT	*1/*1	*1/*1	Normal Metabolizer	*1/*1	Normal Metabolizer	*1/*1	Normal Metabolizer	*1/*1	Normal Metabolizer
NA18855	TPMT	*1/*3C	*3C/*1	Intermediate Metabolizer	*1/*3C	Intermediate Metabolizer	*3C/*1	Intermediate Metabolizer	*1/*3C	Intermediate Metabolizer
NA18861	TPMT	*1/*1	*1/*1	Normal Metabolizer	*1/*1	Normal Metabolizer	*1/*1	Normal Metabolizer	*1/*1	Normal Metabolizer
NA19226	TPMT	*1/*1	*1/*1	Normal Metabolizer	*1/*1	Normal Metabolizer	*1/*1	Normal Metabolizer	*1/*1	Normal Metabolizer
NA19908	TPMT	*1/*1	*1/*1	Normal Metabolizer	*1/*1	Normal Metabolizer	*1/*1	Normal Metabolizer	*1/*1	Normal Metabolizer
